# Supplementary material for: Evaluation of several lightweight stochastic context-free grammars for RNA secondary structure prediction
Source: Springer Nature journal article supplement (doi:10.1186/1471-2105-5-71), 2004-06-04

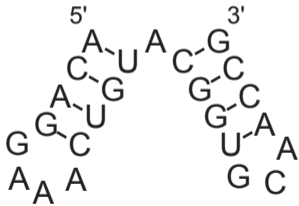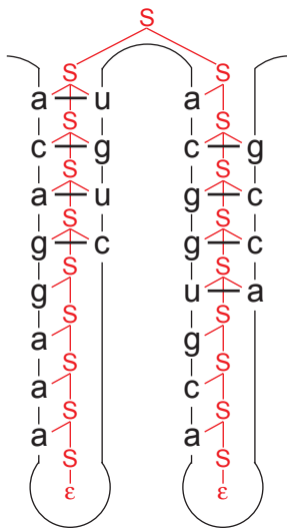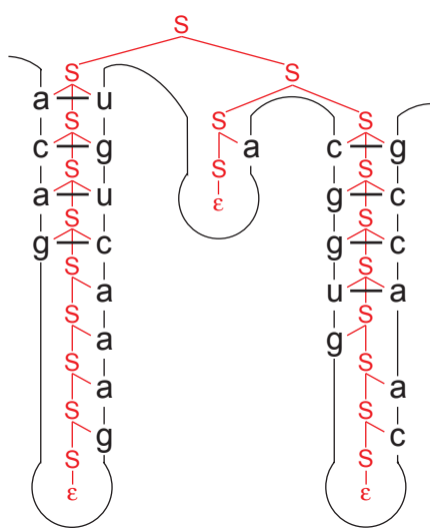

Supplement: 12859_2004_187_MOESM1_ESM.pdf [file 12859_2004_187_MOESM1_ESM.pdf]
